# Supplementary material for: Gene transduction in mammalian cells using Bombyx mori nucleopolyhedrovirus assisted by glycoprotein 64 of Autographa californica multiple nucleopolyhedrovirus
Source: PubMed Central journal article supplement (PMC4999795; doi:10.1038/srep32283), 2016-08-26
Supplement: srep32283-s1.pdf [file srep32283-s1.pdf]

1 **Gene transduction in mammalian cells using *Bombyx mori***  
2 **nucleopolyhedrovirus assisted by glycoprotein 64 of**  
3 ***Autographa californica* multiple nucleopolyhedrovirus**

4  
5 Tatsuya Kato,<sup>1,2,3\*</sup> Saki Sugioka,<sup>2</sup> Kohei Itagaki,<sup>2</sup> and Enoch Y. Park<sup>1,2,3\*</sup>

6  
7 <sup>1</sup> Laboratory of Biotechnology, Green Chemistry Research Division, Research  
8 Institute of Green Science and Technology, Shizuoka University, 836 Ohya  
9 Suruga-ku, Shizuoka, 422-8529, Japan

10 <sup>2</sup> Laboratory of Biotechnology, Department of Applied Biological Chemistry,  
11 Faculty of Agriculture, Shizuoka University, 836 Ohya, Suruga-ku, Shizuoka, 422-  
12 8529, Japan

13 <sup>3</sup> Laboratory of Biotechnology, Department of Bioscience, Graduate School of  
14 Science and Technology, Shizuoka University, 836 Ohya, Suruga-ku, Shizuoka,  
15 422-8529, Japan

16  
17 E-mail:

18 [kato.tatsuya@shizuoka.ac.jp](mailto:kato.tatsuya@shizuoka.ac.jp) (TK)

19 [sakicsxxx@yahoo.co.jp](mailto:sakicsxxx@yahoo.co.jp) (SS)

20 [pixy\\_007bc@yahoo.co.jp](mailto:pixy_007bc@yahoo.co.jp) (KI)

21 [park.enoch@shizuoka.ac.jp](mailto:park.enoch@shizuoka.ac.jp) (EYP)

22  

---

\* Correspondence

Tatsuya Kato ([kato.tatsuya@shizuoka.ac.jp](mailto:kato.tatsuya@shizuoka.ac.jp)); Enoch Y. Park ([park.enoch@shizuoka.ac.jp](mailto:park.enoch@shizuoka.ac.jp))

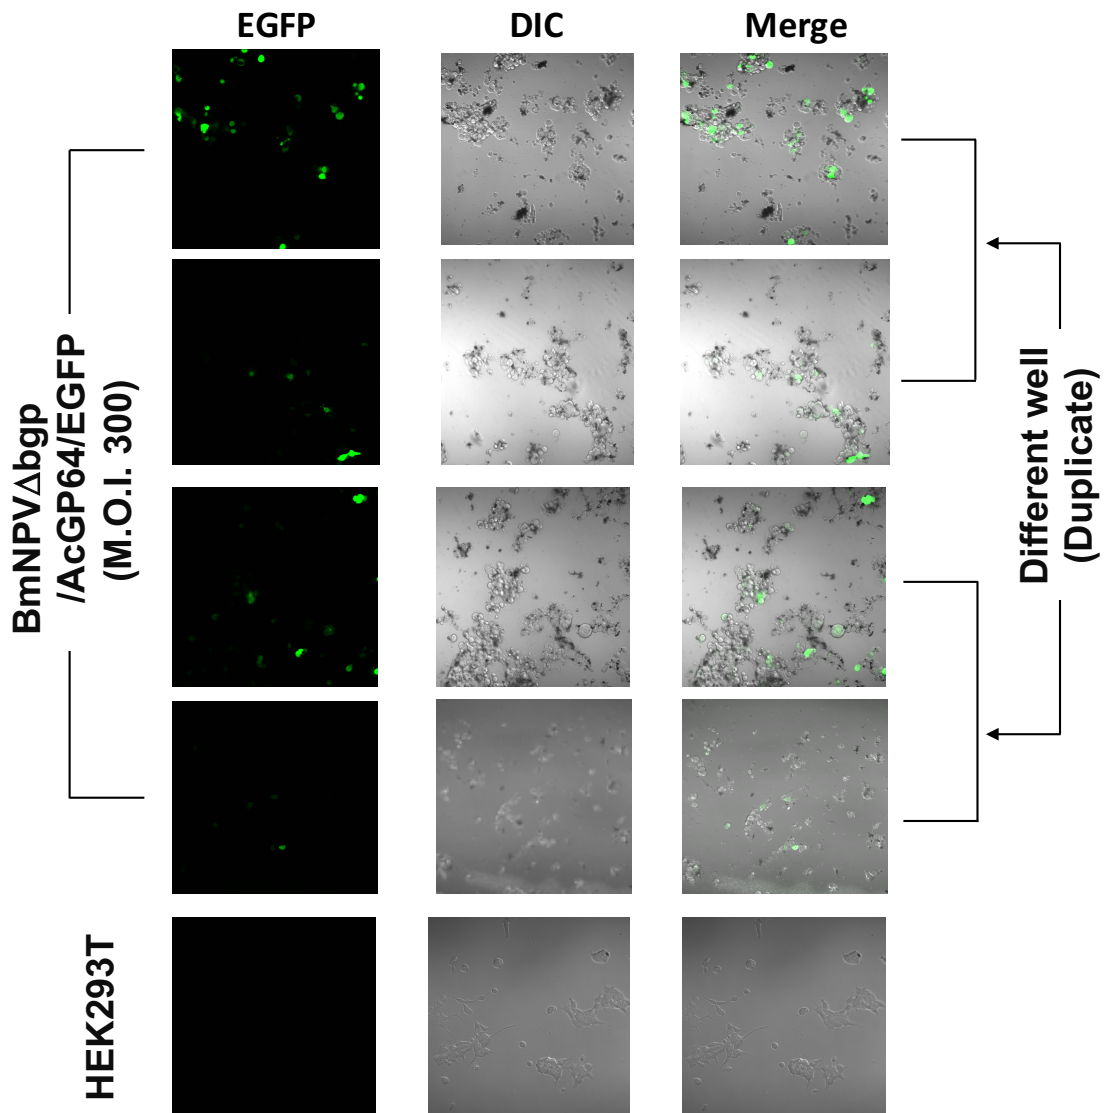

24

25

26 **Figure S1. Fluorescence microscopy of HEK293T cells transduced with**  
 27 **BmNPV $\Delta$ bgrp/AcGP64/EGFP.** Transduction of recombinant  
 28 BmNPV $\Delta$ bgrp/AcGP64/EGFPs into HEK293T cells at an M.O.I. of 300. Each  
 29 transduction efficiency of recombinant BmNPV $\Delta$ bgrp/AcGP64/EGFPs into HEK293T  
 30 cells was 7.8%, 9.5%, 12.7% and 8.3% judging by counting the number of fluorescent  
 31 cells.
